# Supplementary material for: Identification of a noncanonical function for ribose-5-phosphate isomerase A promotes colorectal cancer formation by stabilizing and activating β-catenin via a novel C-terminal domain
Source: PLoS Biol. 2018 Jan 16;16(1):e2003714. doi: 10.1371/journal.pbio.2003714 (PMC5786329; doi:10.1371/journal.pbio.2003714)
Supplement: S4 Data — (XLSX) [file pbio.2003714.s012.xlsx]

## Sheet: 5C
Batch1	Day 1							Day 2							Day 3							Day 4							Day 5								Batch1-4 Ave.		day 1	day 2	day 3	day 4	day 5		Ave	day 1	day 2	day 3	day 4
	PC	RPIA	del A	del B	del A+B	del C	del D	PC	RPIA	del A	del B	del A+B	del C	del D	PC	RPIA	del A	del B	del A+B	del C	del D	PC	RPIA	del A	del B	del A+B	del C	del D	PC	RPIA	del A	del B	del A+B	del C	del D		PC	batch 1	1	1.24051	1.80638	2.45639	3.01286		PC	1	1.09015	1.70055	2.05971
	0.949416	0.942981	0.975641	0.976095	0.978556	0.928442	0.99991	1.07708	1.29252	1.64085	1.58218	1.55599	1.49554	1.4219	1.54066	2.19732	2.21987	1.99293	1.85279	1.85029	1.51741	1.57001	2.78949	3.25085	3.33755	2.7868	2.41885	0.908022	1.08142	2.27664	3.42766	3.37922	3.06142	2.40769	0.853939			batch 2	1	1.04975	1.71593	1.92718	2.2806		RPIA	1	1.21603	2.23421	4.18372
	0.954539	0.956768	0.951732	0.959911	0.908068	0.939425	0.965904	1.1287	1.2414	1.52246	1.42219	1.4355	1.46186	1.45265	1.31567	1.9042	2.11267	1.95424	1.82929	1.84004	1.40526	1.2538	2.16954	2.90996	2.98521	2.57477	2.52521	1.23903	1.16278	2.5021	4.10232	4.36927	3.64524	2.83896	0.815592			batch 3	1	1.01276	1.55927	1.79556	2.06107		del A	1	1.30471	2.49677	4.88707
	0.959464	0.961858	0.960602	0.962143	0.957128	0.947113	0.971511	1.20987	1.33197	1.53153	1.49865	1.44077	1.46405	1.45718	1.74536	2.14239	2.1547	2.02177	1.85467	1.84279	1.55937	2.24617	3.86207	4.44514	4.30695	4.02813	4.12326	1.40924	2.43196	6.1402	6.35998	5.96354	5.82491	5.9212	1.20141			batch 4	1	1.05759	1.7206	2.99895	5.87718		del B	1	1.23918	2.22967	4.53899
	0.987637	0.966312	0.962337	0.964189	0.957504	0.956449	0.972416	1.24553	1.33409	1.54637	1.49995	1.47347	1.47229	1.46206	1.76939	2.15151	2.19404	2.10343	1.87121	1.85725	1.61798	2.36655	4.15179	4.45459	4.37894	4.08208	4.14504	1.47364	2.48062	6.16883	6.37599	6.15496	5.85686	5.99991	1.30053			Ave	1	1.09015	1.70055	2.05971	2.45151		del A+B	1	1.17791	2.00696	3.79752
	1.00734	0.978614	0.981233	0.964375	0.95788	0.962673	0.980013	1.24927	1.35106	1.56469	1.53158	1.48062	1.48657	1.46514	1.82988	2.24483	2.23761	2.10734	1.9214	1.86732	1.62105	2.63173	4.19548	4.49258	4.38862	4.14091	4.2481	1.49245	2.95011	6.17137	6.39334	6.23868	5.85912	6.15148	1.32224			Std	6.40988e-17	0.102124	0.102953	0.34978	0.498377		del C	1	1.36228	2.32065	4.90662
	1.0099	0.981583	0.983161	0.977397	0.96709	0.96432	0.989418	1.26425	1.38541	1.56835	1.5379	1.50298	1.51458	1.47707	1.84899	2.25013	2.27251	2.11664	1.92572	1.87885	1.62992	2.64848	4.23345	4.49817	4.45	4.16009	4.33761	1.50149	2.96153	6.18792	6.44482	6.26118	5.9031	6.21994	1.35986			%	6.40988e-17	0.0936786	0.0605412	0.16982	0.203294		del D	1	1.17451	1.49066	1.34533
	1.01542	0.983068	0.985475	0.989861	0.981376	0.975669	0.989599	1.26779	1.40111	1.57067	1.55186	1.50637	1.52391	1.47924	1.85943	2.26986	2.28157	2.12185	1.92948	1.89716	1.66465	2.71369	4.27226	4.55582	4.50005	4.18339	4.34274	1.50475	3.00074	6.235	6.55762	6.28835	6.03224	6.27613	1.39314		RPIA	batch 1	1	1.38386	2.23522	3.96354	6.47607
	1.01699	1.01276	0.997622	0.996558	1.0169	0.985188	0.992132	1.27705	1.41829	1.5911	1.57827	1.50975	1.52592	1.48684	1.901	2.27283	2.28234	2.1291	1.93399	1.99527	1.67351	2.72531	4.33059	4.57491	4.61966	4.2082	4.36086	1.50565	3.13451	6.48231	6.57806	6.40517	6.04483	6.46212	1.44289			batch 2	1	1.22041	2.38215	4.38767	7.50646
	1.01837	1.01509	1.01401	1.00251	1.06183	1.02674	0.993036	1.28355	1.42529	1.59245	1.58515	1.51539	1.5845	1.55051	1.90533	2.30549	2.40266	2.15106	1.97177	2.01175	1.70679	2.7391	4.33292	4.57722	4.63417	4.30125	4.3636	1.53785	3.17864	6.53151	6.65769	6.68868	6.11494	6.55383	1.46658			batch 3	1	1.10757	2.38675	4.24484	7.3383
	1.02074	1.03015	1.05277	1.03879	1.0669	1.08294	1.02469	1.28592	1.46686	1.61771	1.59725	1.52385	1.61525	1.5903	1.94612	2.32924	2.4686	2.16166	1.97967	2.04689	1.71927	2.81456	4.34819	4.68423	4.80941	4.32888	4.41486	1.6131	3.26651	6.55442	6.69587	6.74058	6.20723	6.60453	1.60514			batch 4	1	1.15229	1.93275	4.13882	7.3296
	1.02507	1.03249	1.05489	1.06744	1.07179	1.0833	1.04495	1.29281	1.46856	1.65358	1.6006	1.52704	1.62605	1.59808	1.96404	2.36212	2.47844	2.21486	1.99903	2.12689	1.72976	2.83564	4.38213	4.73109	4.93387	4.35407	4.5408	1.65325	3.32365	7.04754	6.98297	6.77742	6.48373	6.79106	1.78927			Ave	1	1.21603	2.23421	4.18372	7.16261
	1.03512	1.13832	1.08053	1.10073	1.07498	1.14774	1.07642	1.30424	1.48977	1.6609	1.62217	1.65242	1.65937	1.63932	2.05073	2.39266	2.49136	2.22063	2.03061	2.31708	1.75057	2.93159	4.49454	4.80224	5.11097	4.3785	4.56148	1.77589	3.40029	7.24161	7.13799	7.08864	6.57734	7.12916	1.88369			Std	0	0.121123	0.212943	0.178724	0.464872
Ave	1	1	1	1	1	1	1	1.24051	1.38386	1.58839	1.55065	1.51035	1.53582	1.50669	1.80638	2.23522	2.2997	2.10796	1.92497	1.96096	1.63296	2.45639	3.96354	4.3314	4.37128	3.96059	4.03187	1.46786	3.01286	6.47607	6.61843	6.46072	6.09043	6.41093	1.47648			%	0	0.0996054	0.09531	0.0427189	0.0649027
SD	0.0297398	0.0524677	0.0418059	0.0457211	0.0565034	0.0696233	0.03294	0.0698089	0.0758976	0.0464819	0.0564333	0.0568178	0.0684126	0.0695172	0.201024	0.129416	0.130236	0.0819602	0.0633441	0.146679	0.0998814	0.528132	0.722422	0.598939	0.61817	0.609175	0.740659	0.2193	0.330111	0.389171	0.262905	0.347605	0.263551	0.372919	0.21919		del A	batch 1	1	1.58839	2.2997	4.3314	6.61843
Batch2	Day 1							Day 2							Day 3							Day 4							Day 5									batch 2	1	1.33151	2.72077	5.20032	8.61047
	PC	RPIA	del A	del B	del A+B	del C	del D	PC	RPIA	del A	del B	del A+B	del C	del D	PC	RPIA	del A	del B	del A+B	del C	del D	PC	RPIA	del A	del B	del A+B	del C	del D	PC	RPIA	del A	del B	del A+B	del C	del D			batch 3	1	1.26899	2.83529	5.56281	8.82832
	1.10118	1.0546	1.08202	1.06818	1.0878	1.06838	1.06831	1.08865	1.2775	1.39764	1.32188	1.30781	1.49376	1.29861	1.39307	2.02831	2.36548	2.23725	2.08897	2.58676	1.18133	1.35617	2.78572	3.6425	3.43797	2.77814	2.49037	0.933236	1.13436	2.44306	3.19887	3.21493	2.36545	1.43233	3.34552			batch 4	1	1.02996	2.1313	4.45374	7.01263
	1.03784	1.01183	1.05246	1.03307	1.04333	1.03066	1.05227	1.09468	1.22104	1.36546	1.23212	1.15781	1.50342	1.31991	1.79702	2.40958	3.00578	2.57205	2.19501	3.23644	1.51964	2.22905	4.55936	5.6578	5.08648	4.51549	3.03353	1.11693	0.880527	2.39321	3.00483	3.051	2.34143	1.96584	1.77275			Ave	1	1.30471	2.49677	4.88707	7.76746
	1.02253	0.991548	1.01838	1.02442	1.02902	0.964629	1.00441	1.05524	1.22007	1.30324	1.20715	1.24163	1.46247	1.12219	1.8005	2.43329	2.68682	2.32231	2.20396	3.14557	1.5249	2.14064	4.97167	5.78295	5.08673	4.24769	5.09967	1.33194	1.75781	6.01112	7.89622	8.44063	6.10643	3.67516	1.67702			Std	1.28198e-16	0.22946	0.33525	0.591974	1.11447
	0.962664	0.985193	0.994775	0.998207	1.0142	1.00535	1.02546	1.03923	1.10911	1.28036	1.23187	1.24955	1.42221	1.23872	1.81326	2.27369	2.69183	2.46869	2.30208	3.10347	1.45022	2.30422	4.92743	5.51572	5.77215	4.59292	5.53701	1.44095	2.11187	7.16226	8.36369	8.54003	7.05726	5.10611	1.64995			%	1.28198e-16	0.175871	0.134274	0.121131	0.143479
	0.968232	0.972729	0.997636	0.989059	0.990439	0.991775	0.980599	1.01881	1.21909	1.29013	1.22075	1.12791	1.46086	1.19411	1.84621	2.24436	2.52091	2.39674	2.24459	3.19756	1.61637	2.18426	4.36359	5.5429	6.17964	4.16363	5.78248	1.65797	2.18194	7.2962	8.4252	8.55536	7.4771	6.14114	1.59432		del B	batch 1	1	1.55065	2.10796	4.37128	6.46072
	0.978673	0.981038	0.981903	0.975212	0.991717	0.977972	0.996387	1.02021	1.17412	1.25581	1.17747	1.10338	1.4137	1.09011	1.76222	2.29569	2.57454	2.34506	2.07491	3.05792	1.53117	2.05665	5.24614	5.5839	4.76207	4.516	5.88969	1.68604	2.2084	7.42158	8.47931	8.66489	7.59209	6.22304	1.60986			batch 2	1	1.22334	2.49362	5.02026	8.87621
	0.949438	0.956842	0.964739	0.967794	0.980218	0.988555	0.980599	1.03621	1.16336	1.29276	1.18489	1.19844	1.32766	1.17782	1.79122	2.77057	2.59195	2.37349	2.15719	3.17018	1.5442	2.11559	4.73851	5.79559	5.21728	4.73499	5.91522	1.7334	2.35248	7.61979	8.58849	8.79298	7.60512	6.2304	1.68754			batch 3	1	1.21065	2.49235	5.26842	8.60139
	0.990274	0.974439	0.943523	0.980899	0.95722	0.957727	0.975086	1.04851	1.16727	1.35664	1.18613	1.12664	1.45833	1.13773	1.75688	2.42278	2.60005	2.54781	2.19603	3.63582	1.43444	2.05804	4.55203	5.36816	5.49298	4.67137	5.98976	1.82237	2.40028	7.62614	8.62234	8.80979	7.65111	7.08805	1.68905			batch 4	1	0.972084	1.82477	3.496	6.2556
	0.969856	0.978839	0.971652	0.963096	0.967186	0.995226	0.939751	1.04132	1.25257	1.30658	1.18934	1.18975	1.37942	1.11592	1.71836	2.64445	3.04511	2.62595	2.11427	3.28429	1.42516	2.07034	4.60189	5.72264	5.30383	4.20937	6.05717	1.73491	2.41675	7.6584	8.79684	9.02986	7.69967	7.28521	1.72814			Ave	1	1.23918	2.22967	4.53899	7.54848
	0.979137	0.962952	0.986909	0.941831	0.943166	0.979582	0.945766	1.07519	1.22911	1.31421	1.21011	1.13992	1.42911	1.12595	1.83785	2.53667	3.04345	2.76714	2.31383	3.13338	1.50435	1.84876	4.97705	5.57651	5.64357	4.78329	6.07971	1.78478	2.42348	7.92896	8.89171	9.19528	7.80571	7.29695	1.73415			Std	1.81299e-16	0.237639	0.325285	0.791544	1.38157
	0.989114	1.00719	0.984048	0.965816	0.972807	1.01363	0.992378	1.0448	1.35449	1.35235	1.22668	1.08064	1.46155	1.14148	1.75479	2.42669	2.97527	2.80893	2.30259	3.39357	1.564	1.76778	4.6229	5.40082	5.00884	4.30953	6.08133	1.7963	2.44204	7.96293	8.92151	9.22594	7.95469	8.0023	1.63993			%	1.81299e-16	0.191771	0.145889	0.174388	0.183027
	1.05106	1.12279	1.02195	1.09242	1.02289	1.02651	1.03899	1.03413	1.25722	1.46296	1.29171	1.20764	1.51884	1.13397	1.31975	2.09968	2.54808	2.45806	2.0928	2.91689	1.15978	0.994683	2.30571	2.81436	3.25153	2.75412	6.10318	1.21792	2.51095	8.3772	9.11937	9.50733	8.13918	8.00414	1.76774		del A+B	batch 1	1	1.51035	1.92497	3.96059	6.09043
Ave	1	1	1	1	1	1	1	1.04975	1.22041	1.33151	1.22334	1.17759	1.44428	1.17471	1.71593	2.38215	2.72077	2.49362	2.19052	3.15515	1.45463	1.92718	4.38767	5.20032	5.02026	4.18971	5.85352	1.52139	2.2806	7.50646	8.61047	8.87621	7.50883	6.81971	1.6864			batch 2	1	1.17759	2.19052	4.18971	7.50883
SD	0.0444726	0.046692	0.0385213	0.0456599	0.0411008	0.0311816	0.0400022	0.0246339	0.0634696	0.0581167	0.0438089	0.0670823	0.0539912	0.074345	0.17248	0.211867	0.234686	0.176758	0.0871357	0.253292	0.143516	0.388702	0.89944	0.947215	0.871172	0.696034	0.316939	0.303886	0.224672	0.632564	0.34845	0.350828	0.570456	0.96294	0.0600132			batch 3	1	1.07027	1.97424	3.75445	7.19346
Batch3	Day 1							Day 2							Day 3							Day 4							Day 5									batch 4	1	0.953426	1.9381	3.28534	5.76312
	PC	RPIA	del A	del B	del A+B	del C	del D	PC	RPIA	del A	del B	del A+B	del C	del D	PC	RPIA	del A	del B	del A+B	del C	del D	PC	RPIA	del A	del B	del A+B	del C	del D	PC	RPIA	del A	del B	del A+B	del C	del D			Ave	1	1.17791	2.00696	3.79752	6.63896
	1.04306	1.08144	1.08697	1.0647	1.09123	1.06442	1.0305	0.998157	1.20344	1.2927	1.2779	1.14146	1.40966	1.07758	1.26303	2.0221	2.33681	2.17953	1.81713	2.09679	1.15398	1.04853	2.12269	2.75318	2.596	2.05488	2.14776	0.996734	0.865951	2.00646	2.33999	2.34668	1.88577	1.95767	0.855013			Std	1.43329e-16	0.239786	0.124135	0.384965	0.843036
	1.00841	1.0285	1.02892	1.00797	1.01712	1.01924	1.05737	1.03782	1.09154	1.28438	1.17843	1.10465	1.42568	1.10962	1.71002	2.63621	3.01696	2.39171	2.14465	2.89388	1.6701	1.8379	2.15301	2.83694	2.74457	4.09831	2.64057	1.2368	0.740355	1.64838	2.11932	2.26577	1.80619	1.86107	0.812373			%	1.43329e-16	0.203569	0.0618523	0.101373	0.126983
	1.01047	1.00515	1.01006	1.0212	1.00891	0.998312	0.993037	1.07611	1.11633	1.27752	1.18351	1.04721	1.33108	1.08571	1.63092	2.38234	3.21829	2.48278	2.07427	3.22064	1.88724	2.01182	3.82497	5.16298	4.95209	3.98268	5.1565	1.96956	1.66808	4.89799	8.51671	8.06937	6.03233	7.75278	1.79678		del C	batch 1	1	1.53582	1.96096	4.03187	6.41093
	0.95576	0.988068	1.00786	0.96981	0.997472	0.962698	1.01966	1.05195	1.0735	1.30568	1.14968	1.03229	1.31283	1.02779	1.58078	2.43552	3.20629	2.53876	1.93874	2.84625	1.81625	1.89693	3.99126	5.31703	4.99127	3.92001	5.54046	2.18375	1.85773	5.98616	8.6208	8.22023	6.03656	7.88054	1.85076			batch 2	1	1.44428	3.15515	5.85352	6.81971
	0.989268	0.950769	0.980182	0.992961	1.01364	0.956688	1.03888	1.06608	1.06387	1.22829	1.17741	1.05019	1.34154	1.0098	1.56938	2.50915	2.87368	2.72371	1.91313	2.90256	1.79974	1.97124	4.197	5.44807	5.07191	4.03341	5.57741	2.22565	1.92178	6.84477	8.74326	8.31411	6.9537	8.12049	2.02896			batch 3	1	1.35551	2.76485	5.64441	8.24596
	0.975363	0.964004	0.957894	0.971336	0.975588	0.95691	0.98096	1.02164	1.11729	1.19082	1.26162	1.09172	1.34778	1.05539	1.67537	2.40448	2.86192	2.62729	2.10909	2.90212	1.76499	1.9489	4.23815	5.5044	5.14824	4.10926	5.62906	2.36663	1.94434	6.96629	8.80131	8.57844	7.06337	8.15232	2.10192			batch 4	1	1.11352	2.23614	4.09669	4.93595
	0.962599	0.973871	0.96965	0.954545	0.954449	1.00321	0.964446	1.00158	1.08096	1.28732	1.20361	1.04572	1.36647	1.0167	1.60403	2.30317	2.90332	2.30724	2.02578	2.88564	1.89685	2.05034	4.26511	5.53648	5.21464	4.14407	5.64597	2.36959	2.06128	7.55297	8.80302	8.6021	7.1902	8.21265	2.18769			Ave	1	1.36228	2.32065	4.90662	7.15887
	0.984025	0.933684	0.963282	0.960651	0.982053	0.975163	0.950644	1.03144	1.10791	1.23539	1.18555	1.01388	1.36314	1.05466	1.63184	2.40303	2.77939	2.47846	1.92854	2.72649	1.66689	1.98036	4.26535	5.58498	5.22176	4.1013	5.662	2.37082	2.0982	7.69182	8.86964	8.66062	7.27774	8.24181	2.21727			Std	1.81299e-16	0.181445	0.408553	0.976754	0.963381
	0.971488	0.95871	0.98606	0.981004	0.970863	0.938658	0.934377	0.962599	1.10815	1.25254	1.18555	1.05417	1.29191	1.10987	1.67401	2.33228	2.78257	2.52374	2.01335	2.68687	1.80073	2.0264	4.32839	5.63004	5.26705	4.11672	5.70073	2.38635	2.21491	8.06024	8.92818	8.7662	7.48912	8.2605	2.24093			%	1.81299e-16	0.133192	0.176051	0.199068	0.134572
	0.965106	1.01093	0.963772	1.00237	1.00518	0.995196	0.967651	0.986077	1.14328	1.25058	1.2288	1.05467	1.34177	1.02631	1.581	2.54164	2.97606	2.68504	2.10611	2.8734	1.79358	1.9138	4.33874	5.6996	5.27264	3.99436	5.7379	2.42726	2.21765	8.12136	8.93283	8.77078	7.83728	8.34575	2.24364		del D	batch 1	1	1.50669	1.63296	1.46786	1.47648
	1.03007	1.04991	1.00859	1.00339	0.953952	1.08646	1.01966	0.971488	1.20152	1.30201	1.24712	1.1054	1.37738	1.06106	1.59856	2.66437	2.85972	2.75449	2.01882	2.88965	1.69795	1.78592	4.45762	5.85292	5.52578	4.13835	5.82627	2.45634	2.24363	8.45393	9.01194	8.92927	7.97256	8.45349	2.25547			batch 2	1	1.17471	1.45463	1.52139	1.6864
	1.10438	1.05497	1.03676	1.07005	1.02955	1.04305	1.04282	0.948238	0.983015	1.32062	1.24864	1.10192	1.3569	0.984904	1.19236	2.0067	2.20847	2.2154	1.60128	2.25394	1.40834	1.07452	4.54184	5.89162	6.01883	2.36001	5.96784	2.48567	2.38313	8.80743	9.05554	9.10278	8.08173	8.54609	2.4312			batch 3	1	1.05162	1.69639	2.32416	2.01518
Ave	1	1	1	1	1	1	1	1.01276	1.10757	1.26899	1.21065	1.07027	1.35551	1.05162	1.55927	2.38675	2.83529	2.49235	1.97424	2.76485	1.69639	1.79556	4.24484	5.56281	5.26842	3.75445	5.64441	2.32416	2.06107	7.3383	8.82832	8.60139	7.19346	8.24596	2.01518			batch 4	1	0.965027	1.17867	1.04674	2.64447
SD	0.0428503	0.0464657	0.0380547	0.037394	0.0378386	0.046111	0.0402307	0.0414308	0.0595545	0.0379198	0.0405978	0.0376692	0.0374434	0.0396955	0.161452	0.206401	0.300279	0.190683	0.151255	0.305356	0.214356	0.351308	0.208976	0.224487	0.309906	0.728806	0.211735	0.156085	0.214847	1.196	0.168891	0.321394	0.72004	0.194448	0.439745			Ave	1	1.17451	1.49066	1.34533	1.72602
Batch4	Day 1							Day 2							Day 3							Day 4							Day 5									Std	1.28198e-16	0.237579	0.231811	0.25997	0.271528
	PC	RPIA	del A	del B	del A+B	del C	del D	PC	RPIA	del A	del B	del A+B	del C	del D	PC	RPIA	del A	del B	del A+B	del C	del D	PC	RPIA	del A	del B	del A+B	del C	del D	PC	RPIA	del A	del B	del A+B	del C	del D			%	1.28198e-16	0.202279	0.155509	0.193238	0.157315
	1.08791	1.06159	0.896782	1.09062	1.24586	0.93208	1.08075	0.984415	1.1617	1.05514	1.01101	0.993599	1.11643	0.99706	1.86311	2.13312	2.04505	1.72528	1.78464	2.13887	1.08183	2.98195	4.08208	4.28363	3.41386	3.00471	3.47787	0.800822	5.51838	7.22176	3.38412	6.0752	5.17828	3.87007	0.221218
	1.06487	1.06321	0.923935	1.12164	0.948419	1.13599	1.0582	0.985628	1.05062	1.02854	0.941221	1.01073	1.15176	0.973252	1.83562	2.06733	2.43485	1.91966	2.12312	2.00288	1.24019	2.94617	4.40514	4.59289	3.68148	3.34488	4.17101	0.929784	5.82119	7.44127	6.81744	6.0235	5.39364	4.32414	2.37361
	1.02686	1.02768	0.929037	1.0827	1.12142	1.08914	1.02628	1.01757	1.21794	1.0577	0.972584	0.948983	1.09294	0.947099	1.70019	1.8592	2.27977	1.76113	2.09488	2.42965	1.09374	3.16307	4.05263	4.3106	3.38991	3.44221	4.04366	0.927259	5.78399	7.49467	6.84477	6.15947	5.86333	4.40813	2.41113
	1.01999	1.04108	1.19984	1.05943	1.07907	1.11401	1.02141	1.12652	1.11804	1.09196	0.941221	0.981739	1.11734	0.933932	1.64076	1.93108	1.9543	1.7756	1.88291	1.98924	1.16534	2.83216	3.86054	4.27853	3.88792	3.45651	3.61962	0.860343	5.77146	7.33872	7.09954	6.13965	5.42263	4.47696	2.45874
	0.955711	0.949296	0.849583	1.04961	0.983434	1.00288	0.957921	1.04789	1.09895	1.00539	0.934845	0.926581	1.08187	0.959364	1.68483	1.76153	2.05525	1.86521	2.08396	2.16237	1.11881	3.13133	4.08573	4.40773	3.0949	3.24831	3.63235	0.889021	5.82038	7.2841	7.17516	6.38176	5.62236	4.75334	2.47425
	0.989064	0.953154	0.914641	0.81646	0.877636	0.955731	0.988583	1.01211	1.10017	1.02107	0.989988	0.971574	1.06913	0.95738	1.65228	1.89027	2.03794	1.72115	2.00226	2.20982	1.01943	3.02541	4.11619	4.31425	3.45591	3.00395	3.80003	0.966759	5.54244	7.27841	7.05653	6.41175	5.94729	4.91965	2.47588
	0.984819	0.943205	0.886394	0.82611	0.915286	0.873256	0.98714	1.10166	1.26018	1.00703	0.951216	0.955572	1.16571	0.93772	1.62479	1.99525	2.21908	1.8802	1.97044	2.20907	1.17598	3.00782	4.57307	4.27416	3.11627	3.18317	4.12811	1.07335	6.13511	7.27354	7.04942	6.43225	5.62199	5.58384	2.48625
	0.951871	0.961277	1.05824	0.962761	0.917733	0.931322	0.956658	1.05961	1.13611	0.986442	0.970171	0.922063	1.1222	0.979565	1.75133	1.88885	2.13088	1.97291	1.68261	2.40358	1.31504	2.79861	3.94664	4.72464	3.53225	3.55309	4.34733	1.08562	6.08801	7.34258	7.15512	6.36625	6.28671	5.73378	2.88278
	0.962584	0.980161	1.19747	0.789578	0.959337	0.99242	0.965135	1.11136	1.26079	0.970405	0.985508	0.8782	1.12902	0.969103	1.67957	1.72579	2.00787	1.82764	1.95557	2.43951	1.2952	3.12587	4.16147	4.8369	3.62858	3.34055	4.64676	1.16823	6.22162	7.3505	7.01534	6.19204	6.19974	5.5802	2.9239
	0.956318	1.01935	1.14408	1.20108	0.951807	0.973166	0.957921	1.12915	1.11844	1.07592	1.02307	0.945218	1.08884	0.995798	1.77356	2.07505	2.14801	1.79887	1.80064	2.37644	1.28114	2.9771	4.04796	4.34395	3.67683	3.27598	4.48135	1.5203	6.06921	7.27049	6.90035	6.37418	6.09526	5.70937	3.31367
Ave	1	1	1	1	1	1	1	1.05759	1.15229	1.02996	0.972084	0.953426	1.11352	0.965027	1.7206	1.93275	2.1313	1.82477	1.9381	2.23614	1.17867	2.99895	4.13882	4.45374	3.496	3.28534	4.09669	1.04674	5.87718	7.3296	7.01263	6.2556	5.76312	4.93595	2.64447
SD	0.0482967	0.0477271	0.136371	0.143707	0.114149	0.0866524	0.0447068	0.0567706	0.0717162	0.0394548	0.0304544	0.0387062	0.0307842	0.0220935	0.0822532	0.134871	0.145554	0.0839579	0.147695	0.169387	0.101205	0.121496	0.221755	0.211136	0.263993	0.183188	0.362956	0.204698	0.243471	0.0839061	0.130597	0.153097	0.373167	0.675181	0.321608
[truncated: 7 more columns]

## Sheet: 5D
batch	transcription ratio	HCT116-RPIA	luciferase(F)	Renilla ( R)	F/R	Average	SD	TOP/FOP	Fold	HCT116-pcDNA	luciferase(F)	Renilla ( R)	F/R	Average	SD	TOP/FOP	Fold	pcDNA TOP/FOP mean			HCT116-pcDNA	HCT116-RPIA	HCT116-ΔA	HCT116-ΔB	HCT116-Δ(A+B)	HCT116-ΔC	HCT116-ΔD
1	500ng DNA+ 100ng FOP/TOP+ 2ng Renilla	FOP	1118	128	8.73438					FOP	2419	138	17.529								2.43805	4.04383	2.65946	2.5452	1.80972	3.32108	0.64199
		FOP	1254	136	9.22059					FOP	3677	145	25.3586								0.823966	2.99355	2.37154	2.88641	2.29211	2.42954	0.95824
		FOP	1212	141	8.59574	8.85024	0.328139			FOP	3348	155	21.6	21.4959	3.91586						1.17603	2.53829	2.63395	2.32353	2.30589	2.79203	0.72658
		TOP	7696	147	52.3537					TOP	6895	198	34.8232							Mean	1	2.76592	2.55498	2.58505	2.13591	2.84755	0.775603
		TOP	13932	147	94.7755					TOP	6222	178	40.7978							STDEV	0.24895	0.321913	0.159378	0.28355	0.282568	0.448354	0.163726
		TOP	12340	149	82.8188	76.6493	21.8735	8.66071	4.04383	TOP	6147	161	38.1801	37.9337	2.99487	1.7647	0.823966			TTEST		0.0255394	0.00310663	0.00782468	0.0195677	0.0142211	0.299197
2	500ng DNA+ 100ng FOP/TOP+ 2ng Renilla	FOP	1300	146	8.90411					FOP	1675	178	9.41011									*	**	**	*	*	NS
		FOP	1053	143	7.36364					FOP	2032	171	11.883
		FOP	1220	168	7.2619	7.84322	0.920167			FOP	1859	138	13.471	11.5881	2.04646
		TOP	8880	188	47.234					TOP	6177	177	43.4802
		TOP	9171	176	52.108					TOP	5688	188	74.1064
		TOP	9221	179	51.514	50.2853	2.65912	6.41131	2.99355	TOP	6172	193	63.9378	60.5081	15.5985	5.2216	2.43805
3	500ng DNA+ 100ng FOP/TOP+ 2ng Renilla	FOP	894	165	5.41818					FOP	2128	175	12.16
		FOP	1139	164	6.94512					FOP	2120	166	12.7711
		FOP	1015	177	5.73446	6.03259	0.805944			FOP	1742	221	7.88235	10.9378	2.66369
		TOP	5077	221	22.9729					TOP	6154	202	30.4653
		TOP	7485	188	39.8138					TOP	6237	233	26.7682
		TOP	7262	204	35.598	32.7949	8.76344	5.43629	2.53829	TOP	5947	234	25.4145	27.5494	2.61444	2.51873	1.17603	2.14171
batch	transcription ratio	HCT116-ΔD	luciferase(F)	Renilla ( R)	F/R	Average	SD	TOP/FOP	Fold
1	500ng DNA+ 100ng FOP/TOP+ 2ng Renilla	FOP	3645	153	23.8235
		FOP	3468	169	20.5207
		FOP	3399	166	20.4759	21.6067	1.91995
		TOP	4841	160	30.2563
		TOP	4829	172	28.0756
		TOP	5358	174	30.7931	29.7083	1.43924	1.37496	0.64199
2	500ng DNA+ 100ng FOP/TOP+ 2ng Renilla	FOP	1385	136	10.1838
		FOP	1341	173	7.75145
		FOP	1319	153	8.62092	8.85206	1.23255
		TOP	3663	189	19.381
		TOP	3492	213	16.3944
		TOP	3408	182	18.7253	18.1669	1.56965	2.05228	0.95824
3	500ng DNA+ 100ng FOP/TOP+ 2ng Renilla	FOP	3615	181	19.9724
		FOP	2922	171	17.0877
		FOP	2785	194	14.3557	17.1386	2.8087
		TOP	5077	217	23.3963
		TOP	5824	212	27.4717
		TOP	5566	191	29.1414	26.6698	2.95528	1.55613	0.72658
batch	transcription ratio	HCT116-ΔA	luciferase(F)	Renilla ( R)	F/R	Average	SD	TOP/FOP	Fold
1	500ng DNA+ 100ng FOP/TOP+ 2ng Renilla	FOP	2273	199	11.4221
		FOP	3284	197	16.6701
		FOP	2617	185	14.1459	14.0794	2.6246
		TOP	17215	187	92.0588
		TOP	13091	164	79.8232
		TOP	13396	195	68.6974	80.1931	11.6851	5.69579	2.65946
2	500ng DNA+ 100ng FOP/TOP+ 2ng Renilla	FOP	1666	210	7.93333
		FOP	2436	159	15.3208
		FOP	2126	154	13.8052	12.3531	3.90192
		TOP	13627	217	62.7972
		TOP	12246	196	62.4796
		TOP	12024	191	62.9529	62.7432	0.24122	5.07915	2.37154
3	500ng DNA+ 100ng FOP/TOP+ 2ng Renilla	FOP	2073	171	12.1228
		FOP	2146	178	12.0562
		FOP	2107	208	10.1298	11.4363	1.13192
		TOP	13637	220	61.9864
		TOP	14239	216	65.9213
		TOP	13980	213	65.6338	64.5138	2.19356	5.64116	2.63395
batch	transcription ratio	HCT116-ΔB	luciferase(F)	Renilla ( R)	F/R	Average	SD	TOP/FOP	Fold
1	500ng DNA+ 100ng FOP/TOP+ 2ng Renilla	FOP	995	127	7.83465
		FOP	1147	174	6.59195
		FOP	1192	168	7.09524	7.17395	0.625073
		TOP	5852	158	37.038
		TOP	6711	155	43.2968
		TOP	6398	173	36.9827	39.1058	3.62959	5.45109	2.5452
2	500ng DNA+ 100ng FOP/TOP+ 2ng Renilla	FOP	1026	164	6.2561
		FOP	1238	158	7.83544
		FOP	1176	175	6.72	6.93718	0.811763
		TOP	7175	162	44.2901
		TOP	8025	192	41.7969
		TOP	7279	171	42.5673	42.8847	1.27659	6.18187	2.88641
3	500ng DNA+ 100ng FOP/TOP+ 2ng Renilla	FOP	1102	191	5.76963
		FOP	1278	210	6.08571
		FOP	1211	194	6.24227	6.03254	0.240763
		TOP	6061	202	30.005
		TOP	6294	198	31.7879
		TOP	6247	221	28.267	30.0199	1.7605	4.97633	2.32353
batch	transcription ratio	HCT116-Δ(A+B)	luciferase(F)	Renilla ( R)	F/R	Average	SD	TOP/FOP	Fold
1	500ng DNA+ 100ng FOP/TOP+ 2ng Renilla	FOP	4158	173	24.0347
		FOP	4579	193	23.7254
		FOP	4419	164	26.9451	24.9017	1.77637
		TOP	20439	191	107.01
		TOP	18549	215	86.2744
		TOP	18868	196	96.2653	96.5167	10.3703	3.8759	1.80972
2	500ng DNA+ 100ng FOP/TOP+ 2ng Renilla	FOP	3620	178	20.3371
		FOP	3703	200	18.515
		FOP	3799	182	20.8736	19.9086	1.23632
		TOP	21169	205	103.263
		TOP	20390	204	99.951
		TOP	19526	217	89.9816	97.732	6.91338	4.90904	2.29211
3	500ng DNA+ 100ng FOP/TOP+ 2ng Renilla	FOP	3890	245	15.8776
		FOP	4138	208	19.8942
		FOP	3776	233	16.206	17.3259	2.23027
		TOP	18095	233	77.6609
		TOP	22781	238	95.7185
		TOP	20079	241	83.3154	85.5649	9.23657	4.93855	2.30589
batch	transcription ratio	HCT116-ΔC	luciferase(F)	Renilla ( R)	F/R	Average	SD	TOP/FOP	Fold
1	500ng DNA+ 100ng FOP/TOP+ 2ng Renilla	FOP	1574	164	9.59756
		FOP	1468	167	8.79042
		FOP	1557	170	9.15882	9.18227	0.404081
		TOP	14667	211	69.5118
		TOP	11964	194	61.6701
		TOP	12044	186	64.7527	65.3115	3.95063	7.11279	3.32108
2	500ng DNA+ 100ng FOP/TOP+ 2ng Renilla	FOP	1940	168	11.5476
		FOP	2224	146	15.2329
		FOP	2043	178	11.4775	12.7527	2.1482
		TOP	13938	196	71.1122
		TOP	12896	191	67.5183
		TOP	12632	209	60.4402	66.3569	5.42999	5.20337	2.42954
3	500ng DNA+ 100ng FOP/TOP+ 2ng Renilla	FOP	2044	201	10.1692
		FOP	1849	208	8.88942
		FOP	1749	219	7.9863	9.01496	1.09683
		TOP	10878	194	56.0722
		TOP	12033	231	52.0909
		TOP	11515	215	53.5581	53.9071	2.01343	5.97974	2.79203
